# Supplementary material for: Posttranslational Acylations of the Rat Brain Transketolase Discriminate the Enzyme Responses to Inhibitors of ThDP-Dependent Enzymes or Thiamine Transport
Source: MDPI journal article supplement (doi:10.3390/ijms25020917), 2024-01-11
Supplement: s1 [file s1]

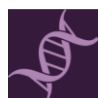

Article

# Posttranslational Acylations of the Rat Brain Transketolase Discriminate the Enzyme Responses to Inhibitors of ThDP-Dependent Enzymes or Thiamine Transport

Vasily A. Aleshin <sup>1,2</sup>, Thilo Kaehne <sup>3</sup>, Maria V. Maslova <sup>4</sup>, Anastasia V. Graf <sup>1,4</sup> and Victoria I. Bunik <sup>1,2,5,\*</sup>

## Supplementary data

**Table S1.** The peptides used for the relative quantifications by MS. The acylated (P1, P3, P5) and reference (P2, P4, P6–9) peptides of TKT, the peptides of reference proteins actin (ActB, P10–P12) and tubulin (Tubb3, P13–P15), and the peptides of sirtuin 5 (Sirt5, P16–P18) are shown. Dependent on the number of the lysine, arginine and histidine residues in a peptide, several charged precursor variants (2+, 3+ or 4+) with monoisotopic precursor mass and the C13-isotopomeric variants ([M+1] and [M+2]) are detected to increase the quantification accuracy. ox – Met oxidation (+16), cam – Cys carbamidomethylation (+57), n.a. – not analyzed.

| N   | Peptide                              | Specification       | C13-isotopomeric variants of the precursors |              |              |
|-----|--------------------------------------|---------------------|---------------------------------------------|--------------|--------------|
|     |                                      |                     | monoisotopic                                | [M+1]        | [M+2]        |
| P1  | SK(mal)DDQVTVIGAGVTLHEALAAAEM(ox)LKK | Malonyl-K499        | 966.5023+++                                 | 966.8366+++  | 967.1708+++  |
|     |                                      |                     | 725.1286++++                                | n.a.         | n.a.         |
| P2  | SKDDQVTVIGAGVTLHEALAAAEM(ox)LKK      | K499 de-malonylated | 703.6285++++                                | 703.8792++++ | 704.1298++++ |
|     |                                      |                     | 563.1042; +5                                | 563.3048; +5 | 563.5053; +5 |
| P3  | K(ac)ISSDLDGHPVPK                    | Acetyl-K102         | 717.8830++                                  | 718.3845++   | 718.8858++   |
|     |                                      |                     | 478.9244+++                                 | 479.2587+++  | 479.5930+++  |
| P4  | ISSDLDGHPVPK                         | K102 deacetylated   | 632.8302++                                  | 633.3317++   | 633.8330++   |
|     |                                      |                     | 422.2226+++                                 | 422.5569+++  | 422.8911+++  |
| P5  | M(ox)EGYHK(ac)PDQQLQALKDTANR         | Acetyl-K6           | 843.7553+++                                 | 844.0896+++  | 844.4237+++  |
| P6  | QAFTDVTATGSLGQGLGAAC(cam)GM(ox)AYTGK | TKT                 | 1274.5940++                                 | 1275.0954++  | 1275.5963++  |
| P7  | LGQSDPAPLQHGVVDVYQK                  | TKT                 | 1012.0158++                                 | 1012.5172++  | 1013.0186++  |
|     |                                      |                     | 675.0130+++                                 | 675.3473+++  | 675.6815+++  |
| P8  | TSRPENAIHYSNNEDFQVGQAK               | TKT                 | 1241.1039++                                 | 1241.6053++  | 1242.1067++  |
|     |                                      |                     | 827.7383+++                                 | 828.0726+++  | 828.4069+++  |
| P9  | SVPM(ox)STVFYPSDGVATEK               | TKT                 | 965.9588++                                  | 966.4603++   | 966.9613++   |
| P10 | VAPEEHPVLLTEAPLNPK                   | ActB                | 977.5358++                                  | 978.0373++   | 978.5387++   |
|     |                                      |                     | 652.0263+++                                 | 652.3606+++  | 652.6949+++  |
| P11 | DLYANTVLSGGTTM(ox)YPIGIADR           | ActB                | 1116.0361++                                 | 1116.5375++  | 1117.0386++  |
| P12 | QEYDESGPSIVHR                        | ActB                | 758.8550++                                  | 759.3564++   | 759.8577++   |
|     |                                      |                     | 506.2391+++                                 | 506.5734+++  | 506.9076+++  |
| P13 | EVDEQM(ox)LAIQSK                     | Tubb3               | 703.8452++                                  | 704.3467++   | 704.8474++   |
| P14 | LATPTYGDLNHLVSATM(ox)SGVTTSR         | Tubb3               | 1311.1656++                                 | 1311.6670++  | 1312.1682++  |
|     |                                      |                     | 874.4462+++                                 | 874.7805+++  | 875.1146+++  |
| P15 | YLTVAIVFR                            | Tubb3               | 535.3057++                                  | 535.8071++   | 536.3085++   |
| P16 | GVPVAEFNM(ox)ETTPATNR                | Sirt5               | 925.4411++                                  | 925.9425++   | 926.4435++   |
| P17 | NKEPNPGHLAIAQC(cam)EAR               | Sirt5               | 952.9734++                                  | 953.4748++   | 953.9758++   |
|     |                                      |                     | 635.6514+++                                 | 635.9856+++  | 636.3196+++  |
| P18 | VVVITQNIDELHR                        | Sirt5               | 768.4306++                                  | 768.9321++   | 769.4334++   |

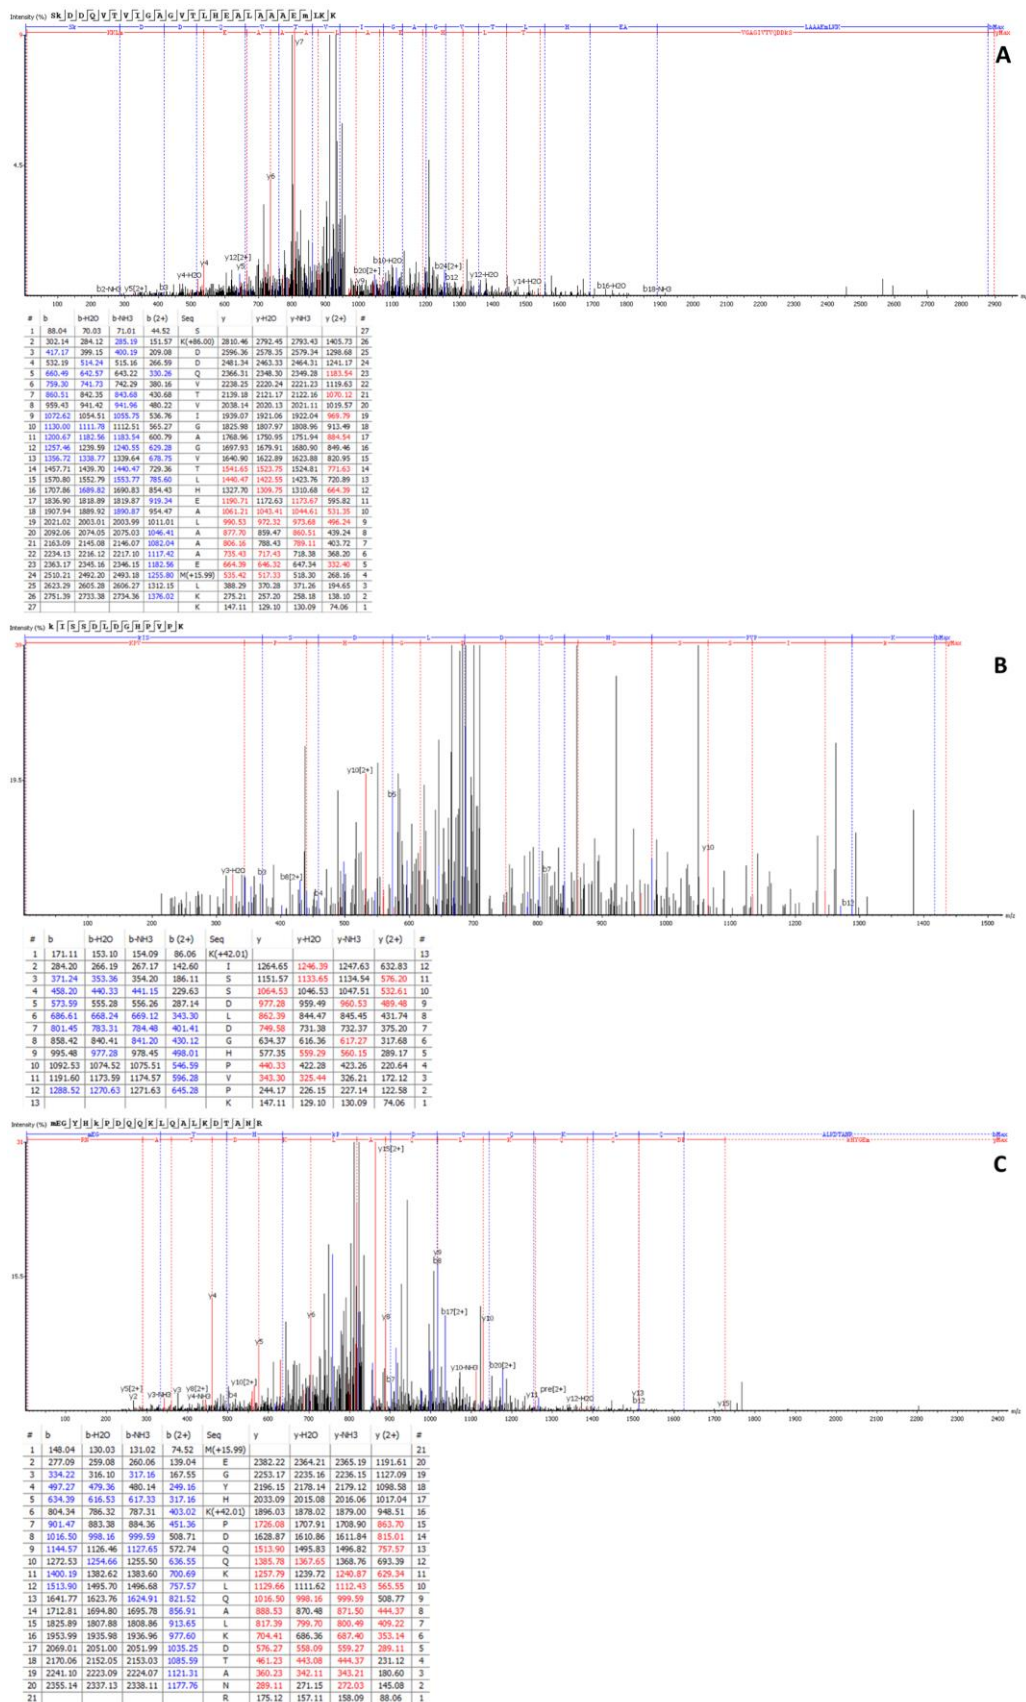

**Figure S1.** Representative MS/MS spectra of the TKT peptides containing acylated residues. A – The peptide with malonylated K499 residue. B – The peptide with acetylated K102 residue. C – The peptide with acetylated K6 residue. The images of the spectra are created by PEAKS Studio Xpro. The fragment masses of the peptides indicated in the

tables below the MS/MS spectra, unambiguously determine the site of the modification, even if the second site is present in the sequence.

**Table S2.** The  $p$ -values for statistical significance of the differences between the control and experimental groups of rats shown in Figure 1. The significances estimated by the Student and Mann-Whitney tests are compared.

| Test     | Oxythiamine (OT) vs. Control |              | Metformin + Amprolium (M+A) vs. Control |              |
|----------|------------------------------|--------------|-----------------------------------------|--------------|
|          | Student                      | Mann-Whitney | Student                                 | Mann-Whitney |
| Mal-K499 | 0.0002                       | 0.0006       | 0.202                                   | 0.181        |
| Sirt5    | 0.003                        | 0.009        | 0.108                                   | 0.251        |
| Ac-K102  | 0.278                        | 0.198        | 0.598                                   | 0.557        |
| Ac-K6    | 0.483                        | 0.357        | 0.146                                   | 0.121        |
